# Supplementary material for: Involvement of the Small ncRNAome in Fresh Peripheral Blood Mononuclear Cells of Human T-cell Leukemia Virus Type I- Associated Myelopathy/Tropical Spastic Paraparesis Patients and Viral Carriers
Source: Preprints.org preprint supplement (doi:10.20944/preprints202212.0401.v1), 2022-12-21
Supplement: Supplementary file 1 [file supplementary]

## Sheet: Table S4
Table S4. List of significantly expressed known small RNAs in ASP and HAM vs.HCs
Gene ID	p (Corr)	p	FC ([ASP] vs [HC])	Log FC ([ASP] vs [HC])	Regulation ([ASP] vs [HC])	FC ([HAM] vs [HC])	Log FC ([HAM] vs [HC])	Regulation ([HAM] vs [HC])	Accession	Entrez ID	Ensembl ID	Gene Type	DB Refs	Chromosome	Start	End	Strand
MI0000479	2.19617e-11	6.65507e-14	777.334	9.60239	up	345.966	8.43448	up	hsa-mir-150	406942	ENSG00000207782	miRNA	miRBase:MI0000479	chr19	50004042	50004125	-
MI0000273	4.97686e-08	6.85276e-10	-107.776	-6.75189	down	-398.215	-8.6374	down	hsa-mir-183	406959	ENSG00000207691	miRNA	miRBase:MI0000273	chr7	129414745	129414854	-
MI0000805	4.97686e-08	6.53737e-10	63.9458	5.99878	up	19.5187	4.28679	up	hsa-mir-342	442909	ENSG00000199082	miRNA	miRBase:MI0000805	chr14	100575992	100576090	+
MI0000086	4.97686e-08	7.5407e-10	90.1533	6.49431	up	43.7141	5.45003	up	hsa-mir-28	407020	ENSG00000207651	miRNA	miRBase:MI0000086	chr3	188406569	188406654	+
MI0000439	4.97686e-08	7.36161e-10	491.072	8.93979	up	224.915	7.81324	up	hsa-mir-23b	407011	ENSG00000207563	miRNA	miRBase:MI0000439	chr9	97847490	97847586	+
ENSG00000200229	8.00057e-08	2.03969e-09	175.475	7.45512	up	228.233	7.83437	up	SNORD3B-1		ENSG00000200229	snoRNA	RFAM:RF00012	chr17	18965225	18965440	+
MI0000681	8.00057e-08	2.3149e-09	522.885	9.03035	up	175.124	7.45224	up	hsa-mir-155	406947	ENSG00000207795	miRNA	miRBase:MI0000681	chr21	26946292	26946356	+
MI0000079	8.00057e-08	2.24096e-09	250.429	7.96826	up	106.816	6.73898	up	hsa-mir-23a	407010	ENSG00000207980	miRNA	miRBase:MI0000079	chr19	13947401	13947473	-
ENSG00000202364	8.00057e-08	1.64032e-09	187.613	7.55162	up	237.629	7.89257	up	SNORD3A		ENSG00000202364	snoRNA	RFAM:RF00012	chr17	19091329	19091544	+
ENSG00000201750	8.00057e-08	2.42441e-09	161.209	7.33279	up	209.363	7.70986	up	SNORD3B-2		ENSG00000201750	snoRNA	RFAM:RF00012	chr17	18967234	18967449	-
ENSG00000206653	9.03017e-08	3.01006e-09	290.728	8.18352	up	259.655	8.02045	up	SNORD29		ENSG00000206653	snoRNA	RFAM:RF00070	chr11	62621376	62621440	-
MI0001729	1.4737e-07	5.57468e-09	-181.138	-7.50095	down	-449.195	-8.8112	down	hsa-mir-451a	574411	ENSG00000207794	miRNA	miRBase:MI0001729	chr17	27188387	27188458	-
MI0000460	1.4737e-07	5.8055e-09	-115.044	-6.84605	down	-469.5	-8.87498	down	hsa-mir-144	406936	ENSG00000207618	miRNA	miRBase:MI0000460	chr17	27188551	27188636	-
ENSG00000199753	1.52897e-07	6.48655e-09	154.237	7.269	up	144.858	7.17849	up	SNORD104		ENSG00000199753	snoRNA	RFAM:RF00289	chr17	62223443	62223512	+
MI0000469	1.87885e-07	8.54022e-09	27.5829	4.7857	up	12.9543	3.69536	up	hsa-mir-125a	406910	ENSG00000208008	miRNA	miRBase:MI0000469	chr19	52196507	52196592	+
MI0002470	2.18835e-07	1.06102e-08	-17.7141	-4.14682	down	-30.8194	-4.94577	down	hsa-mir-486	619554	ENSG00000221035	miRNA	miRBase:MI0002470	chr8	41517959	41518026	-
MI0000804	2.86895e-07	1.47795e-08	32.0401	5.00181	up	19.532	4.28777	up	hsa-mir-328	442901	ENSG00000207948	miRNA	miRBase:MI0000804	chr16	67236224	67236298	-
ENSG00000201823	3.01349e-07	1.73504e-08	116.078	6.85895	up	48.4953	5.59977	up	SNORD48		ENSG00000201823	snoRNA	RFAM:RF00282	chr6	31803040	31803103	+
ENSG00000239039	3.01349e-07	1.66887e-08	79.9762	6.3215	up	26.9437	4.75187	up	SNORD13		ENSG00000239039	snoRNA	RFAM:RF01210	chr8	33370993	33371096	+
chr16.trna27	3.04532e-07	1.93876e-08	43.0524	5.42802	up	14.2671	3.83462	up	trna27			tRNA		chr16	22207032	22207113	-
ENSG00000212158	3.04532e-07	1.94077e-08	183.344	7.51841	up	98.1706	6.61722	up	SNORD66		ENSG00000212158	snoRNA	RFAM:RF00572	chr3	184043484	184043559	+
ENSG00000208317	3.04532e-07	2.03022e-08	290.78	8.18379	up	109.969	6.78095	up	SNORD78		ENSG00000208317	snoRNA	RFAM:RF00592	chr1	173834760	173834824	-
MI0000746	3.23669e-07	2.25588e-08	19.806	4.30787	up	11.9013	3.57305	up	hsa-mir-99b	407056	ENSG00000207550	miRNA	miRBase:MI0000746	chr19	52195865	52195934	+
ENSG00000221740	3.34215e-07	2.43065e-08	108.288	6.75874	up	50.6207	5.66166	up	SNORD93		ENSG00000221740	snoRNA	RFAM:RF00606	chr7	22896232	22896305	+
MI0000299	6.15759e-07	4.66484e-08	55.0082	5.78157	up	28.5985	4.83787	up	hsa-mir-222	407007	ENSG00000207725	miRNA	miRBase:MI0000299	chrX	45606421	45606530	-
MI0000803	6.16865e-07	4.86015e-08	36.8717	5.20444	up	19.1541	4.25958	up	hsa-mir-330	442902	ENSG00000199066	miRNA	miRBase:MI0000803	chr19	46142252	46142345	-
MI0000239	6.1975e-07	5.07068e-08	36.4689	5.18859	up	14.941	3.90121	up	hsa-mir-197	406974	ENSG00000207709	miRNA	miRBase:MI0000239	chr1	110141515	110141589	+
ENSG00000206607	6.4181e-07	5.44566e-08	193.135	7.59347	up	106.604	6.73611	up	SNORD44		ENSG00000206607	snoRNA	RFAM:RF00287	chr1	173835106	173835166	-
MI0000300	8.56429e-07	7.94094e-08	52.1565	5.70478	up	18.8461	4.2362	up	hsa-mir-223	407008	ENSG00000207939	miRNA	miRBase:MI0000300	chrX	65238712	65238821	+
ENSG00000207008	8.56429e-07	7.90176e-08	134.916	7.07592	up	54.314	5.76325	up	SNORA54		ENSG00000207008	snoRNA	RFAM:RF00430	chr11	2985001	2985123	-
MI0000760	8.56429e-07	8.04525e-08	31.7159	4.98713	up	13.9771	3.80499	up	hsa-mir-361	494323	ENSG00000199051	miRNA	miRBase:MI0000760	chrX	85158641	85158712	-
ENSG00000207066	9.11696e-07	8.84069e-08	167.906	7.39151	up	110.068	6.78224	up	SNORD50A		ENSG00000207066	snoRNA	RFAM:RF00278	chr6	86387012	86387086	-
ENSG00000200181	9.19099e-07	9.19099e-08	104.839	6.71203	up	68.14	6.09043	up	SNORD85		ENSG00000200181	snoRNA	RFAM:RF00188	chr1	31441011	31441083	-
MI0000281	9.29496e-07	1.014e-07	131.896	7.04326	up	44.1835	5.46544	up	hsa-mir-199a-2	406977	ENSG00000208024	miRNA	miRBase:MI0000281	chr1	172113675	172113784	-
MI0000242	9.29496e-07	9.91128e-08	131.463	7.03852	up	44.0808	5.46208	up	hsa-mir-199a-1	406976	ENSG00000207752	miRNA	miRBase:MI0000242	chr19	10928102	10928172	-
MI0003815	9.29496e-07	9.78206e-08	45.6792	5.51347	up	29.713	4.89302	up	hsa-mir-1301	100302246	ENSG00000221445	miRNA	miRBase:MI0003815	chr2	25551509	25551590	-
ENSG00000201669	9.4962e-07	1.06473e-07	207.853	7.69942	up	99.8481	6.64166	up	SNORD31		ENSG00000201669	snoRNA	RFAM:RF00089	chr11	62620797	62620867	-
ENSG00000201778	1.12444e-06	1.29481e-07	118.1	6.88386	up	173.66	7.44012	up	Y_RNA		ENSG00000201778	scRNA	RFAM:RF00019	chr3	156871337	156871429	+
ENSG00000206874	1.2688e-06	1.49949e-07	146.491	7.19466	up	75.3913	6.23633	up	SNORD26		ENSG00000206874	snoRNA	RFAM:RF00087	chr11	62622764	62622838	-
MI0000282	1.38247e-06	1.67573e-07	122.183	6.9329	up	37.7861	5.23978	up	hsa-mir-199b	406978	ENSG00000207581	miRNA	miRBase:MI0000282	chr9	131007000	131007109	-
ENSG00000251986	1.42442e-06	1.78056e-07	14.2266	3.83052	up	8.35162	3.06206	up	Y_RNA		ENSG00000251986	scRNA	RFAM:RF00019	chr3	41910490	41910587	-
ENSG00000201786	1.42442e-06	1.81289e-07	13.8233	3.78903	up	8.20909	3.03722	up	Y_RNA		ENSG00000201786	scRNA	RFAM:RF00019	chr4	154188061	154188162	-
MI0000816	1.53421e-06	1.99913e-07	63.4724	5.98806	up	22.7825	4.50985	up	hsa-mir-335	442904	ENSG00000199043	miRNA	miRBase:MI0000816	chr7	130135952	130136045	+
MI0003676	1.55434e-06	2.07245e-07	246.164	7.94348	up	101.014	6.65841	up	hsa-mir-654	724024	ENSG00000207934	miRNA	miRBase:MI0003676	chr14	101506556	101506636	+
ENSG00000200954	1.56508e-06	2.1342e-07	160.29	7.32454	up	78.847	6.30098	up	SNORD74		ENSG00000200954	snoRNA	RFAM:RF00284	chr1	173836809	173836888	-
ENSG00000200494	1.6255e-06	2.34633e-07	14.6837	3.87614	up	8.6955	3.12027	up	Y_RNA		ENSG00000200494	scRNA	RFAM:RF00019	chr20	16651286	16651387	-
ENSG00000221500	1.6255e-06	2.41363e-07	186.798	7.54534	up	117.177	6.87255	up	SNORD100		ENSG00000221500	snoRNA	RFAM:RF00609	chr6	133137941	133138016	+
MI0000087	1.6255e-06	2.30207e-07	52.9403	5.72629	up	14.3796	3.84596	up	hsa-mir-29a	407021	ENSG00000198981	miRNA	miRBase:MI0000087|RFAM:RF00074	chr7	130561506	130561569	-
MI0000073	1.6255e-06	2.37961e-07	-12.7559	-3.67309	down	-56.7743	-5.82717	down	hsa-mir-19a	406979	ENSG00000207610	miRNA	miRBase:MI0000073	chr13	92003145	92003226	+
ENSG00000212452	1.90071e-06	2.87986e-07	221.501	7.79117	up	111.276	6.798	up	SNORD69		ENSG00000212452	snoRNA	RFAM:RF00574	chr3	52726752	52726828	+
MI0003581	2.1546e-06	3.32983e-07	28.5211	4.83396	up	16.753	4.06634	up	hsa-mir-574	693159	ENSG00000207944	miRNA	miRBase:MI0003581	chr4	38869653	38869748	+
ENSG00000201405	2.33457e-06	3.67871e-07	82.721	6.37018	up	55.4818	5.79394	up	Y_RNA		ENSG00000201405	scRNA	RFAM:RF00019	chr1	23696747	23696839	+
MI0003639	2.7511e-06	4.41843e-07	42.0433	5.3938	up	12.0177	3.58709	up	hsa-mir-625	693210	ENSG00000207781	miRNA	miRBase:MI0003639	chr14	65937820	65937904	+
MI0000808	3.60154e-06	5.89344e-07	98.4987	6.62203	up	49.6714	5.63434	up	hsa-mir-326	442900	ENSG00000199090	miRNA	miRBase:MI0000808	chr11	75046136	75046230	-
ENSG00000207262	4.07035e-06	6.78392e-07	78.852	6.30108	up	27.4372	4.77806	up	SNORD57		ENSG00000207262	snoRNA	RFAM:RF00274	chr20	2637585	2637656	+
MI0000750	4.26637e-06	7.23991e-07	56.3492	5.81632	up	15.6003	3.9635	up	hsa-mir-26a-2	407016	ENSG00000207789	miRNA	miRBase:MI0000750	chr12	58218392	58218475	-
MI0000477	4.37573e-06	7.55807e-07	16.8737	4.0767	up	9.10442	3.18657	up	hsa-mir-146a	406938	ENSG00000207936	miRNA	miRBase:MI0000477	chr5	159912359	159912457	+
MI0000083	4.39935e-06	7.73219e-07	55.4033	5.7919	up	15.3345	3.93871	up	hsa-mir-26a-1	407015	ENSG00000199075	miRNA	miRBase:MI0000083	chr3	38010895	38010971	+
ENSG00000223336	4.74151e-06	8.47725e-07	30.2685	4.91974	up	17.8146	4.15499	up	RNU2-6P		ENSG00000223336	snRNA	RFAM:RF00004	chr13	46948536	46948725	-
ENSG00000207424	4.82489e-06	8.77254e-07	66.5219	6.05576	up	29.7814	4.89634	up	SNORD30		ENSG00000207424	snoRNA	RFAM:RF00088	chr11	62621135	62621204	-
chr6.trna130	5.49383e-06	1.02283e-06	31.4897	4.97681	up	11.359	3.50576	up	trna130			tRNA		chr6	27763640	27763711	-
chr6.trna174	5.49383e-06	1.03217e-06	31.4362	4.97435	up	11.3466	3.50419	up	trna174			tRNA		chr6	26311424	26311495	-
ENSG00000199214	5.55039e-06	1.0638e-06	72.8173	6.18621	up	74.4924	6.21902	up	Y_RNA		ENSG00000199214	scRNA	RFAM:RF00019	chr15	26063130	26063217	+
MI0000066	5.55039e-06	1.07644e-06	95.5456	6.57812	up	27.0947	4.75994	up	hsa-let-7e	406887	ENSG00000198972	miRNA	miRBase:MI0000066|RFAM:RF00027	chr19	52196039	52196117	+
ENSG00000201548	5.76338e-06	1.1468e-06	69.0608	6.1098	up	34.3388	5.10177	up	Y_RNA		ENSG00000201548	scRNA	RFAM:RF00019	chr10	90345395	90345490	-
chr6.trna173	5.76338e-06	1.15268e-06	31.0001	4.9542	up	11.1921	3.48441	up	trna173			tRNA		chr6	26311975	26312046	-
ENSG00000251806	6.78307e-06	1.37717e-06	264.939	8.04952	up	63.2741	5.98354	up	SNORD119		ENSG00000251806	snoRNA	RFAM:RF00570	chr20	2443608	2443683	-
ENSG00000200710	7.01402e-06	1.46849e-06	208.843	7.70627	up	34.0475	5.08948	up	SNORD81		ENSG00000200710	snoRNA	RFAM:RF00136	chr1	173833284	173833360	-
MI0000449	7.01402e-06	1.48782e-06	46.2236	5.53056	up	23.3489	4.54528	up	hsa-mir-132	406921	ENSG00000207724	miRNA	miRBase:MI0000449	chr17	1953202	1953302	-
MI0005532	7.01402e-06	1.45148e-06	21.6531	4.4365	up	8.66207	3.11471	up	hsa-mir-874	100126343	ENSG00000216009	miRNA	miRBase:MI0005532	chr5	136983261	136983338	-
MI0000234	7.1207e-06	1.55361e-06	-4.94768	-2.30675	down	-27.9318	-4.80384	down	hsa-mir-192	406967	ENSG00000207648	miRNA	miRBase:MI0000234	chr11	64658609	64658718	-
MI0000462	7.1207e-06	1.53994e-06	52.4376	5.71253	up	15.5106	3.95518	up	hsa-mir-152	406943	ENSG00000207947	miRNA	miRBase:MI0000462	chr17	46114527	46114613	-
ENSG00000207280	7.59999e-06	1.68121e-06	36.6171	5.19444	up	22.5215	4.49323	up	SNORD20		ENSG00000207280	snoRNA	RFAM:RF00217	chr2	232321155	232321234	-
MI0001735	7.74377e-06	1.73648e-06	187.022	7.54706	up	82.282	6.36251	up	hsa-mir-409	574413	ENSG00000199107	miRNA	miRBase:MI0001735	chr14	101531637	101531715	+
chr19.trna13	8.68859e-06	1.97468e-06	36.5431	5.19153	up	42.1024	5.39583	up	trna13			tRNA		chr19	4724647	4724719	-
ENSG00000221643	9.61387e-06	2.2141e-06	44.6575	5.48083	up	13.5233	3.75738	up	SNORA77		ENSG00000221643	snoRNA	RFAM:RF00599	chr1	203698709	203698833	+
MI0000814	1.10149e-05	2.57014e-06	47.0841	5.55717	up	13.1717	3.71937	up	hsa-mir-338	442906	ENSG00000211563	miRNA	miRBase:MI0000814	chr17	79099683	79099749	-
ENSG00000222328	1.15789e-05	2.73683e-06	18.6186	4.21867	up	24.1344	4.59302	up	RNU2-2		ENSG00000222328	snRNA	RFAM:RF00004	chr11	62609091	62609281	-
ENSG00000201208	1.34835e-05	3.22786e-06	29.9577	4.90486	up	15.3888	3.94381	up	Y_RNA		ENSG00000201208	scRNA	RFAM:RF00019	chr12	113616228	113616324	-
MI0000472	1.35212e-05	3.28561e-06	109.471	6.77441	up	46.6512	5.54384	up	hsa-mir-127	406914	ENSG00000207608	miRNA	miRBase:MI0000472	chr14	101349316	101349412	+
ENSG00000212232	1.35212e-05	3.31885e-06	69.7639	6.12441	up	18.8061	4.23313	up	SNORD17		ENSG00000212232	snoRNA	RFAM:RF00567	chr20	17943353	17943589	-
MI0003190	1.35739e-05	3.37292e-06	22.467	4.48973	up	13.8836	3.79531	up	hsa-mir-505	574508	ENSG00000207633	miRNA	miRBase:MI0003190	chrX	139006307	139006390	-
ENSG00000202477	1.42342e-05	3.58452e-06	130.135	7.02386	up	41.5767	5.3777	up	SNORD25		ENSG00000202477	snoRNA	RFAM:RF00054	chr11	62623040	62623102	-
chr17.trna16	1.42342e-05	3.62325e-06	24.2608	4.60055	up	9.07163	3.18136	up	trna16			tRNA		chr17	47269890	47269961	+
MI0003642	1.55077e-05	3.9944e-06	37.9099	5.2445	up	19.4783	4.2838	up	hsa-mir-628	693213	ENSG00000207964	miRNA	miRBase:MI0003642	chr15	55665138	55665232	-
ENSG00000222293	1.67054e-05	4.45476e-06	9.31128	3.21898	up	17.729	4.14804	up	U2		ENSG00000222293	snRNA	RFAM:RF00004	chr9	89037853	89038043	-
MI0000075	1.67054e-05	4.44131e-06	-5.68123	-2.5062	down	-25.3787	-4.66555	down	hsa-mir-19b-2	406981	ENSG00000207812	miRNA	miRBase:MI0000075	chrX	133303701	133303796	-
MI0000074	1.67054e-05	4.37755e-06	-5.6761	-2.5049	down	-24.2235	-4.59834	down	hsa-mir-19b-1	406980	ENSG00000207560	miRNA	miRBase:MI0000074	chr13	92003446	92003532	+
MI0003675	1.75116e-05	4.72282e-06	159.331	7.31588	up	34.4067	5.10462	up	hsa-mir-411	693121	ENSG00000199109	miRNA	miRBase:MI0003675	chr14	101489662	101489757	+
ENSG00000222370	1.89856e-05	5.19555e-06	47.6213	5.57353	up	14.0942	3.81703	up	SNORA36B		ENSG00000222370	snoRNA	RFAM:RF00340	chr1	220373888	220374018	-
MI0006442	1.89856e-05	5.23543e-06	47.5097	5.57015	up	14.0271	3.81015	up	hsa-mir-664	100302234		miRNA	miRBase:MI0006442	chr1	220373880	220373961	-
ENSG00000223247	2.05931e-05	5.7411e-06	14.656	3.87342	up	9.87722	3.3041	up	U2		ENSG00000223247	snRNA	RFAM:RF00004	chr3	73160143	73160333	+
MI0000764	2.16398e-05	6.16407e-06	-6.80929	-2.76751	down	-23.1556	-4.53329	down	hsa-mir-363	574031	ENSG00000207572	miRNA	miRBase:MI0000764	chrX	133303408	133303482	-
MI0005559	2.16398e-05	6.12117e-06	35.4744	5.14871	up	20.307	4.34391	up	hsa-mir-744	100126313	ENSG00000211589	miRNA	miRBase:MI0005559	chr17	11985216	11985313	+
ENSG00000222467	2.23956e-05	6.44723e-06	34.9807	5.12849	up	27.0706	4.75865	up	Y_RNA		ENSG00000222467	scRNA	RFAM:RF00019	chr2	122360649	122360740	-
MI0000298	2.3099e-05	6.71971e-06	33.9486	5.08528	up	15.4027	3.94511	up	hsa-mir-221	407006	ENSG00000207870	miRNA	miRBase:MI0000298	chrX	45605585	45605694	-
MI0000736	2.42466e-05	7.12702e-06	19.5715	4.29068	up	9.28182	3.21441	up	hsa-mir-30c-1	407031	ENSG00000207962	miRNA	miRBase:MI0000736	chr1	41222956	41223044	+
MI0000254	2.53734e-05	7.53514e-06	19.5815	4.29142	up	9.2245	3.20547	up	hsa-mir-30c-2	407032	ENSG00000199094	miRNA	miRBase:MI0000254	chr6	72086663	72086734	-
chr5.trna15	2.57538e-05	7.75504e-06	231.717	7.85622	up	72.2233	6.17439	up	trna15			tRNA		chr5	180615416	180615488	-
MI0000482	2.57538e-05	7.80419e-06	-6.60271	-2.72306	down	-24.4248	-4.61027	down	hsa-mir-185	406961	ENSG00000208023	miRNA	miRBase:MI0000482	chr22	20020662	20020743	+
MI0000683	2.6645e-05	8.15499e-06	35.3115	5.14207	up	10.964	3.4547	up	hsa-mir-181b-2	406956	ENSG00000207737	miRNA	miRBase:MI0000683|RFAM:RF00076	chr9	127455989	127456077	+
MI0000270	2.79274e-05	8.6321e-06	34.3206	5.101	up	10.6855	3.41758	up	hsa-mir-181b-1	406955	ENSG00000207975	miRNA	miRBase:MI0000270|RFAM:RF00076	chr1	198828002	198828111	-
ENSG00000202400	3.22929e-05	1.0275e-05	210.06	7.71466	up	92.4612	6.53078	up	SNORD82		ENSG00000202400	snoRNA	RFAM:RF00158	chr2	232325082	232325151	-
MI0000461	3.22929e-05	1.01383e-05	19.551	4.28917	up	12.0797	3.59451	up	hsa-mir-145	406937	ENSG00000207700	miRNA	miRBase:MI0000461	chr5	148810209	148810296	+
ENSG00000223249	3.22929e-05	1.02731e-05	30.0147	4.9076	up	16.0154	4.00139	up	Y_RNA		ENSG00000223249	scRNA	RFAM:RF00019	chr2	190618190	190618285	+
ENSG00000240690	3.43101e-05	1.10208e-05	18.2221	4.18762	up	14.407	3.8487	up	AC103817.1		ENSG00000240690	scRNA_pseudogene		chr8	87530850	87530918	-
ENSG00000200831	3.90386e-05	1.2658e-05	72.2868	6.17566	up	37.7126	5.23697	up	SNORD36B		ENSG00000200831	snoRNA	RFAM:RF00049	chr9	136216950	136217023	+
MI0000084	5.32353e-05	1.74225e-05	24.6721	4.62481	up	5.09178	2.34817	up	hsa-mir-26b	407017	ENSG00000199121	miRNA	miRBase:MI0000084	chr2	219267369	219267445	+
MI0000090	7.82518e-05	2.58468e-05	-2.85918	-1.5156	down	-23.2662	-4.54017	down	hsa-mir-32	407036	ENSG00000207698	miRNA	miRBase:MI0000090	chr9	111808509	111808578	-
MI0000465	8.12595e-05	2.70865e-05	8.00851	3.00153	up	4.10677	2.038	up	hsa-mir-191	406966	ENSG00000207605	miRNA	miRBase:MI0000465	chr3	49058051	49058142	-
MI0003834	8.96519e-05	3.01556e-05	20.4469	4.35381	up	6.38006	2.67357	up	hsa-mir-769	768217	ENSG00000211580	miRNA	miRBase:MI0003834	chr19	46522190	46522307	+
chr6.trna65	9.03043e-05	3.09224e-05	15.2091	3.92686	up	5.53214	2.46784	up	trna65			tRNA		chr6	28574933	28575004	+
MI0000447	9.03043e-05	3.08193e-05	13.8457	3.79136	up	5.49557	2.45827	up	hsa-mir-128-1	406915	ENSG00000207654	miRNA	miRBase:MI0000447	chr2	136422967	136423048	+
ENSG00000206602	9.90698e-05	3.42241e-05	16.9934	4.08691	up	15.0683	3.91344	up	SNORD58A		ENSG00000206602	snoRNA	RFAM:RF00151	chr18	47017653	47017717	-
chr16.trna8	0.000100637	3.50703e-05	11.0085	3.46055	up	3.891	1.96014	up	trna8			tRNA		chr16	3238094	3238165	+
MI0000077	0.000100993	3.55006e-05	21.6526	4.43647	up	4.71381	2.23689	up	hsa-mir-21	406991	ENSG00000199004	miRNA	miRBase:MI0000077	chr17	57918627	57918698	+
chr16.trna7	0.000124258	4.44316e-05	55.7124	5.79993	up	57.1304	5.83619	up	trna7			tRNA		chr16	3225692	3225764	+
ENSG00000223001	0.000124258	4.4307e-05	6.29349	2.65386	up	20.2667	4.34104	up	U2		ENSG00000223001	snRNA	RFAM:RF00004	chr6	89773219	89773409	-
chr5.trna9	0.000134333	4.84412e-05	54.0166	5.75533	up	55.3733	5.79112	up	trna9			tRNA		chr5	180634755	180634827	+
MI0005566	0.000136736	4.9722e-05	22.261	4.47644	up	11.2911	3.49712	up	hsa-mir-374b	100126317	ENSG00000212027	miRNA	miRBase:MI0005566	chrX	73438382	73438453	-
chr6.trna13	0.000138679	5.08491e-05	53.2947	5.73592	up	54.4617	5.76717	up	trna13			tRNA		chr6	26556774	26556846	+
chr5.trna11	0.000151992	5.6191e-05	50.2635	5.65144	up	51.0006	5.67244	up	trna11			tRNA		chr5	180648979	180649051	-
ENSG00000241049	0.000157286	5.86625e-05	9.63825	3.26877	up	15.4519	3.94971	up	AL672138.1		ENSG00000241049	scRNA_pseudogene		chrX	67674121	67674204	+
ENSG00000222627	0.000157286	5.91013e-05	5.2691	2.39756	up	22.6353	4.5005	up	U2		ENSG00000222627	snRNA	RFAM:RF00004	chr3	127793916	127794092	-
chr16.trna10	0.000159395	6.08527e-05	31.6392	4.98364	up	19.061	4.25255	up	trna10			tRNA		chr16	3241501	3241573	+
chr1.trna119	0.000159395	6.08599e-05	48.8495	5.61027	up	49.3804	5.62587	up	trna119			tRNA		chr1	145395522	145395594	-
MI0000085	0.000165814	6.43157e-05	12.6032	3.65572	up	3.08536	1.62544	up	hsa-mir-27a	407018	ENSG00000207808	miRNA	miRBase:MI0000085	chr19	13947254	13947331	-
MI0003129	0.000165814	6.42122e-05	14.8621	3.89356	up	3.68145	1.88027	up	hsa-mir-146b	574447	ENSG00000202569	miRNA	miRBase:MI0003129	chr10	104196269	104196341	+
ENSG00000238942	0.000181119	7.08009e-05	53.4427	5.73992	up	32.9909	5.044	up	snR39B		ENSG00000238942	snoRNA	RFAM:RF01299	chr3	186502585	186502653	+
MI0000267	0.000190359	7.49898e-05	5.89641	2.55984	up	2.51049	1.32797	up	hsa-mir-10b	406903	ENSG00000207744	miRNA	miRBase:MI0000267|RFAM:RF00104	chr2	177015031	177015140	+
MI0003600	0.000190837	7.63348e-05	-5.07307	-2.34286	down	-9.92737	-3.31141	down	hsa-mir-550a-1	693133	ENSG00000207771	miRNA	miRBase:MI0003600	chr7	30329410	30329506	+
MI0003601	0.000190837	7.63348e-05	-5.07307	-2.34286	down	-9.92737	-3.31141	down	hsa-mir-550a-2	693134	ENSG00000207573	miRNA	miRBase:MI0003601	chr7	32772593	32772689	+
ENSG00000239180	0.000201108	8.10528e-05	18.339	4.19684	up	14.8988	3.89713	up	Y_RNA		ENSG00000239180	scRNA	RFAM:RF00019	chr9	72926523	72926617	-
MI0000458	0.000203313	8.26885e-05	12.0113	3.58632	up	2.38338	1.25301	up	hsa-mir-142	406934	ENSG00000207567	miRNA	miRBase:MI0000458	chr17	56408593	56408679	-
ENSG00000201754	0.000203313	8.31733e-05	47.1344	5.55871	up	16.5919	4.05241	up	SNORD52		ENSG00000201754	snoRNA	RFAM:RF00276	chr6	31804853	31804919	+
MI0000065	0.000212111	8.74155e-05	15.7458	3.97689	up	6.38131	2.67385	up	hsa-let-7d	406886	ENSG00000199133	miRNA	miRBase:MI0000065|RFAM:RF00027	chr9	96941116	96941202	+
ENSG00000202314	0.000227958	9.46373e-05	80.4053	6.32922	up	56.9755	5.83227	up	SNORD6		ENSG00000202314	snoRNA	RFAM:RF00342	chr11	93464668	93464740	-
ENSG00000222345	0.00024249	0.000101405	35.3457	5.14346	up	12.2001	3.60882	up	SNORD19		ENSG00000222345	snoRNA	RFAM:RF00569	chr3	52725394	52725469	+
MI0000727	0.000249952	0.000105283	10.3981	3.37825	up	4.03552	2.01275	up	hsa-mir-128-2	406916	ENSG00000207625	miRNA	miRBase:MI0000727	chr3	35785968	35786051	+
ENSG00000222726	0.000271703	0.000115268	4.33559	2.11623	up	20.43	4.35262	up	RNU2-7P		ENSG00000222726	snRNA	RFAM:RF00004	chr13	21186300	21186477	+
ENSG00000222626	0.000277223	0.00011845	4.27026	2.09433	up	19.8927	4.31417	up	U2		ENSG00000222626	snRNA	RFAM:RF00004	chr5	157403774	157403964	-
ENSG00000222276	0.000284459	0.000122404	4.24479	2.08569	up	19.337	4.27329	up	U2		ENSG00000222276	snRNA	RFAM:RF00004	chr14	96850961	96851152	+
MI0000440	0.000299469	0.00012977	18.6533	4.22136	up	4.92636	2.30052	up	hsa-mir-27b	407019	ENSG00000207864	miRNA	miRBase:MI0000440	chr9	97847727	97847823	+
MI0000286	0.00030492	0.000133056	-5.97938	-2.58	down	-16.7558	-4.06659	down	hsa-mir-210	406992	ENSG00000199038	miRNA	miRBase:MI0000286	chr11	568089	568198	-
chr15.trna11	0.000308596	0.000135595	18.9169	4.2416	up	18.9948	4.24753	up	trna11			tRNA		chr15	26327381	26327452	-
ENSG00000222493	0.000372701	0.000164892	17.71	4.14649	up	25.4416	4.66912	up	Y_RNA		ENSG00000222493	scRNA	RFAM:RF00019	chr12	2969115	2969199	+
MI0010629	0.000379356	0.000168986	9.13441	3.19131	up	5.4683	2.45109	up	hsa-mir-2110	100302224	ENSG00000238742	miRNA	miRBase:MI0010629	chr10	115933864	115933938	-
ENSG00000212163	0.000389147	0.000176885	63.4385	5.98729	up	24.2812	4.60177	up	SNORD91A		ENSG00000212163	snoRNA	RFAM:RF00580	chr17	2233570	2233664	-
MI0000061	0.000391536	0.000179158	14.1853	3.82632	up	3.36031	1.74859	up	hsa-let-7a-2	406882	ENSG00000198975	miRNA	miRBase:MI0000061|RFAM:RF00027	chr11	122017230	122017301	-
MI0000060	0.000400724	0.000186595	14.3182	3.83977	up	3.31707	1.72991	up	hsa-let-7a-1	406881	ENSG00000199165	miRNA	miRBase:MI0000060|RFAM:RF00027	chr9	96938239	96938318	+
MI0000062	0.000400724	0.000187005	14.3383	3.8418	up	3.31697	1.72987	up	hsa-let-7a-3	406883	ENSG00000198986	miRNA	miRBase:MI0000062|RFAM:RF00027	chr22	46508629	46508702	+
chr5.trna8	0.000404489	0.000189987	13.3471	3.73846	up	3.25775	1.70387	up	trna8			tRNA		chr5	180633868	180633939	+
chr12.trna13	0.000416566	0.000196922	13.3246	3.73602	up	3.47282	1.79611	up	trna13			tRNA		chr12	125406301	125406372	-
MI0000266	0.000439008	0.000210192	7.78217	2.96017	up	2.83729	1.50452	up	hsa-mir-10a	406902	ENSG00000207777	miRNA	miRBase:MI0000266|RFAM:RF00104	chr17	46657200	46657309	-
ENSG00000252906	0.000439008	0.000209734	12.1136	3.59856	up	6.57579	2.71717	up	SCARNA3		ENSG00000252906	snoRNA	RFAM:RF00565	chr1	175937534	175937676	-
chr16.trna34	0.000460117	0.000221693	11.2809	3.49581	up	7.40454	2.88841	up	trna34			tRNA		chr16	686736	686806	-
chr15.trna2	0.00053003	0.000256984	21.5894	4.43225	up	12.5014	3.64402	up	trna2			tRNA		chr15	79152904	79152976	+
chr14.trna13	0.00056536	0.000275827	21.2721	4.41089	up	12.2933	3.61979	up	trna13			tRNA		chr14	58706613	58706685	-
MI0000786	0.000589612	0.000291232	11.7997	3.56068	up	3.92475	1.9726	up	hsa-mir-378a	494327	ENSG00000199047	miRNA	miRBase:MI0000786	chr5	149112388	149112453	+
chr6.trna66	0.000589612	0.000289506	14.2361	3.83149	up	3.3019	1.7233	up	trna66			tRNA		chr6	28611222	28611293	+
ENSG00000199200	0.000647732	0.000321903	13.5428	3.75945	up	14.1152	3.81918	up	Y_RNA		ENSG00000199200	scRNA	RFAM:RF00019	chr10	34490908	34491002	-
MI0003185	0.000672667	0.000336333	-2.87153	-1.52182	down	-6.16436	-2.62395	down	hsa-mir-501	574503	ENSG00000211538	miRNA	miRBase:MI0003185	chrX	49774330	49774413	+
chr13.trna3	0.000674061	0.000340904	12.8536	3.6841	up	12.2223	3.61145	up	trna3			tRNA		chr13	45492062	45492133	-
MI0000815	0.000674061	0.000341116	9.20219	3.20198	up	4.70198	2.23327	up	hsa-mir-339	442907	ENSG00000199023	miRNA	miRBase:MI0000815	chr7	1062569	1062662	-
MI0000488	0.000701066	0.000356906	-2.71244	-1.43959	down	-13.3433	-3.73805	down	hsa-mir-194-1	406969	ENSG00000207624	miRNA	miRBase:MI0000488	chr1	220291499	220291583	-
ENSG00000202072	0.000704112	0.000360591	5.99465	2.58368	up	18.3668	4.19903	up	Y_RNA		ENSG00000202072	scRNA	RFAM:RF00019	chr7	138100225	138100319	+
MI0000732	0.000723476	0.0003727	-2.71733	-1.44219	down	-13.4782	-3.75256	down	hsa-mir-194-2	406970	ENSG00000207596	miRNA	miRBase:MI0000732	chr11	64658827	64658911	-
ENSG00000201279	0.000745454	0.000386281	6.52303	2.70554	up	6.31256	2.65823	up	Y_RNA		ENSG00000201279	scRNA	RFAM:RF00019	chr11	3685045	3685141	-
ENSG00000200615	0.000816533	0.000425587	8.43213	3.0759	up	7.01584	2.81061	up	Y_RNA		ENSG00000200615	scRNA	RFAM:RF00019	chr11	33025796	33025891	-
MI0002468	0.000894578	0.000468976	-2.02361	-1.01693	down	-4.23307	-2.08171	down	hsa-mir-484	619553	ENSG00000202641	miRNA	miRBase:MI0002468	chr16	15737151	15737229	+
MI0005561	0.000901212	0.000477103	11.7454	3.55402	up	11.3759	3.50791	up	hsa-mir-877	100126314	ENSG00000216101	miRNA	miRBase:MI0005561	chr6	30552109	30552194	+
ENSG00000200127	0.000901212	0.000477915	9.7407	3.28403	up	17.5769	4.13561	up	Y_RNA		ENSG00000200127	scRNA	RFAM:RF00019	chr17	41149933	41150024	-
chr6.trna10	0.000916746	0.000488931	12.4382	3.63671	up	2.9223	1.5471	up	trna10			tRNA		chr6	26553731	26553802	+
MI0000272	0.000971944	0.000521315	-3.65881	-1.87137	down	-12.2778	-3.61798	down	hsa-mir-182	406958	ENSG00000207990	miRNA	miRBase:MI0000272	chr7	129410223	129410332	-
MI0000441	0.00103952	0.000564833	11.9751	3.58197	up	4.31807	2.11039	up	hsa-mir-30b	407030	ENSG00000207582	miRNA	miRBase:MI0000441	chr8	135812763	135812850	-
MI0003139	0.00103952	0.000561516	17.6247	4.13953	up	5.77478	2.52977	up	hsa-mir-181d	574457	ENSG00000207585	miRNA	miRBase:MI0003139	chr19	13985689	13985825	+
chr6.trna119	0.00103952	0.000567013	15.1033	3.91679	up	3.5942	1.84567	up	trna119			tRNA		chr6	28641613	28641684	-
MI0003656	0.00111303	0.000610697	8.26092	3.0463	up	3.05539	1.61136	up	hsa-mir-641	693226	ENSG00000207631	miRNA	miRBase:MI0003656	chr19	40788450	40788548	-
MI0000457	0.00111303	0.000613852	3.75972	1.91063	up	-1.78908	-0.839218	down	hsa-mir-141	406933	ENSG00000207708	miRNA	miRBase:MI0000457	chr12	7073260	7073354	+
MI0000812	0.00112052	0.000624776	12.6626	3.6625	up	5.45145	2.44664	up	hsa-mir-331	442903	ENSG00000199172	miRNA	miRBase:MI0000812	chr12	95702196	95702289	+
MI0017414	0.00112052	0.000623726	8.83628	3.14344	up	2.89685	1.53448	up	hsa-mir-4772	100616157		miRNA	miRBase:MI0017414	chr2	103048749	103048826	+
MI0000100	0.00141684	0.000798585	17.1805	4.1027	up	4.2862	2.0997	up	hsa-mir-98	407054	ENSG00000207787	miRNA	miRBase:MI0000100|RFAM:RF00027	chrX	53583184	53583302	-
chr2.trna27	0.00143942	0.000820034	10.8563	3.44046	up	11.5375	3.52826	up	trna27			tRNA		chr2	70476123	70476193	-
MI0005568	0.00171892	0.000984473	19.8849	4.3136	up	6.68617	2.74118	up	hsa-mir-301b	100126318	ENSG00000212102	miRNA	miRBase:MI0005568	chr22	22007270	22007347	+
ENSG00000202093	0.00173431	0.000998542	6.70557	2.74536	up	5.1797	2.37287	up	SNORD58C		ENSG00000202093	snoRNA	RFAM:RF00151	chr18	47015615	47015678	-
MI0000802	0.00183903	0.00106441	8.8445	3.14478	up	1.97781	0.983907	up	hsa-mir-340	442908	ENSG00000198995	miRNA	miRBase:MI0000802	chr5	179442303	179442397	-
MI0000081	0.00191056	0.0011116	6.39402	2.67672	up	2.05598	1.03982	up	hsa-mir-24-2	407013	ENSG00000209707	miRNA	miRBase:MI0000081	chr19	13947101	13947173	-
ENSG00000199961	0.00201427	0.00117804	25.4449	4.6693	up	9.96733	3.31721	up	SNORD1B		ENSG00000199961	snoRNA	RFAM:RF00213	chr17	74557191	74557274	+
MI0000107	0.00223882	0.00132294	3.60762	1.85105	up	-1.45255	-0.538587	down	hsa-mir-29b-2	407025	ENSG00000207790	miRNA	miRBase:MI0000107|RFAM:RF00074	chr1	207975788	207975868	-
MI0000080	0.00224975	0.00133622	6.19856	2.63193	up	1.97086	0.978828	up	hsa-mir-24-1	407012	ENSG00000207617	miRNA	miRBase:MI0000080	chr9	97848303	97848370	+
MI0000105	0.00247221	0.00147583	3.62129	1.8565	up	-1.39941	-0.48482	down	hsa-mir-29b-1	407024	ENSG00000207748	miRNA	miRBase:MI0000105|RFAM:RF00074	chr7	130562218	130562298	-
chr21.trna2	0.00256511	0.00153907	10.7593	3.42752	up	11.0381	3.46442	up	trna2			tRNA		chr21	18827107	18827177	-
MI0000067	0.00260755	0.00158033	3.99204	1.99713	up	-1.3886	-0.473627	down	hsa-let-7f-1	406888	ENSG00000199072	miRNA	miRBase:MI0000067|RFAM:RF00027	chr9	96938629	96938715	+
MI0000068	0.00260755	0.0015755	4.16322	2.0577	up	-1.30941	-0.388917	down	hsa-let-7f-2	406889	ENSG00000208012	miRNA	miRBase:MI0000068|RFAM:RF00027	chrX	53584153	53584235	-
ENSG00000221116	0.00268599	0.00163601	44.9021	5.48871	up	24.9118	4.63876	up	SNORD110		ENSG00000221116	snoRNA	RFAM:RF00610	chr20	2634858	2634932	+
MI0000064	0.00269083	0.00164712	11.0838	3.47038	up	4.55274	2.18673	up	hsa-let-7c	406885	ENSG00000199030	miRNA	miRBase:MI0000064|RFAM:RF00027	chr21	17912148	17912231	+
chr6.trna33	0.00282471	0.00173762	9.1365	3.19164	up	7.30293	2.86848	up	trna33			tRNA		chr6	27125906	27125977	+
chr1.trna39	0.0032449	0.00203544	9.77337	3.28886	up	9.84787	3.29981	up	trna39			tRNA		chr1	161427898	161427968	+
chr1.trna41	0.0032449	0.00203544	9.77337	3.28886	up	9.84787	3.29981	up	trna41			tRNA		chr1	161435258	161435328	+
chr1.trna35	0.0032449	0.00203544	9.77337	3.28886	up	9.84787	3.29981	up	trna35			tRNA		chr1	161413094	161413164	+
chr1.trna37	0.0032449	0.00203544	9.77337	3.28886	up	9.84787	3.29981	up	trna37			tRNA		chr1	161420467	161420537	+
MI0000072	0.00329781	0.00207862	-2.04466	-1.03186	down	-7.65981	-2.93731	down	hsa-mir-18a	406953	ENSG00000199180	miRNA	miRBase:MI0000072	chr13	92003005	92003075	+
chr18.trna4	0.00341601	0.00216348	7.82294	2.96771	up	3.58076	1.84027	up	trna4			tRNA		chr18	43669271	43669343	-
MI0000748	0.00353835	0.00225168	7.61703	2.92923	up	3.53885	1.82328	up	hsa-mir-130b	406920	ENSG00000207751	miRNA	miRBase:MI0000748	chr22	22007593	22007674	+
chr9.trna7	0.00363703	0.0023255	8.81424	3.13984	up	6.91313	2.78934	up	trna7			tRNA		chr9	14433938	14434009	-
MI0003591	0.00370154	0.00238808	6.94818	2.79663	up	3.16064	1.66022	up	hsa-mir-584	693169	ENSG00000207714	miRNA	miRBase:MI0003591	chr5	148441876	148441972	-
chr5.trna6	0.00371585	0.00240967	6.90127	2.78686	up	3.03233	1.60043	up	trna6			tRNA		chr5	180600650	180600722	+
MI0000433	0.00380695	0.00248028	3.5279	1.81881	up	-1.39226	-0.477426	down	hsa-let-7g	406890	ENSG00000199150	miRNA	miRBase:MI0000433	chr3	52302294	52302377	-
chr1.trna9	0.00383715	0.00251159	12.724	3.66948	up	3.86086	1.94892	up	trna9			tRNA		chr1	94313129	94313213	+
MI0000471	0.00389129	0.00255882	7.37284	2.88222	up	1.47147	0.557253	up	hsa-mir-126	406913	ENSG00000199161	miRNA	miRBase:MI0000471	chr9	139565054	139565138	+
MI0000253	0.00425392	0.00281016	5.67165	2.50377	up	1.58701	0.666314	up	hsa-mir-148a	406940	ENSG00000199085	miRNA	miRBase:MI0000253	chr7	25989539	25989606	-
MI0000809	0.00514246	0.00341272	6.56974	2.71584	up	2.51204	1.32886	up	hsa-mir-151a	442893	ENSG00000207792	miRNA	miRBase:MI0000809	chr8	141742663	141742752	-
MI0003685	0.00560286	0.00373524	6.71912	2.74827	up	2.77775	1.47392	up	hsa-mir-421	693122	ENSG00000202566	miRNA	miRBase:MI0003685	chrX	73438212	73438296	-
MI0006344	0.00638123	0.00427349	3.95623	1.98413	up	1.19786	0.260464	up	hsa-mir-548e	100302231	ENSG00000221214	miRNA	miRBase:MI0006344	chr10	112748684	112748771	+
ENSG00000242746	0.00672432	0.00452363	6.20894	2.63435	up	6.53499	2.70818	up	AC073043.1		ENSG00000242746	scRNA_pseudogene		chr2	200648064	200648134	-
MI0001445	0.00720651	0.00486985	4.58481	2.19686	up	3.27972	1.71357	up	hsa-mir-423	494335	ENSG00000199071	miRNA	miRBase:MI0001445	chr17	28444097	28444190	+
ENSG00000252690	0.00841596	0.00578916	6.57756	2.71755	up	2.06445	1.04576	up	SCARNA15		ENSG00000252690	snoRNA	RFAM:RF00426	chr15	83424697	83424823	+
MI0000735	0.00845922	0.00584455	3.73423	1.90081	up	-1.25035	-0.322331	down	hsa-mir-29c	407026	ENSG00000207966	miRNA	miRBase:MI0000735	chr1	207975197	207975284	-
chr6.trna175	0.00929377	0.00644931	4.77817	2.25646	up	2.53881	1.34415	up	trna175			tRNA		chr6	26305718	26305801	-
MI0003610	0.011677	0.00827032	7.55478	2.91739	up	2.3242	1.21674	up	hsa-mir-598	693183	ENSG00000207600	miRNA	miRBase:MI0003610	chr8	10892716	10892812	-
MI0003820	0.011677	0.00828008	2.94366	1.55761	up	-1.26447	-0.338532	down	hsa-mir-454	768216	ENSG00000211514	miRNA	miRBase:MI0003820	chr17	57215119	57215233	-
MI0003599	0.011677	0.0082432	4.0005	2.00018	up	1.45313	0.539163	up	hsa-mir-589	693174	ENSG00000207973	miRNA	miRBase:MI0003599	chr7	5535450	5535548	-
MI0003589	0.0124818	0.0089264	6.67948	2.73974	up	1.5558	0.637655	up	hsa-mir-582	693167	ENSG00000202601	miRNA	miRBase:MI0003589	chr5	58999432	58999529	-
MI0000470	0.0138135	0.0099625	2.52008	1.33347	up	-1.24198	-0.312643	down	hsa-mir-125b-2	406912	ENSG00000207863	miRNA	miRBase:MI0000470	chr21	17962557	17962645	+
MI0000459	0.0143029	0.0103588	2.8381	1.50493	up	-1.19883	-0.261627	down	hsa-mir-143	406935	ENSG00000208035	miRNA	miRBase:MI0000459	chr5	148808481	148808586	+
MI0000101	0.014744	0.0107229	2.64665	1.40417	up	-1.08944	-0.123589	down	hsa-mir-99a	407055	ENSG00000207638	miRNA	miRBase:MI0000101|RFAM:RF00104	chr21	17911409	17911489	+
ENSG00000239301	0.0151229	0.0110901	4.54503	2.18429	up	5.00044	2.32205	up	AC013403.1		ENSG00000239301	scRNA_pseudogene		chr2	27363780	27363848	-
ENSG00000223154	0.0183844	0.0136409	7.20902	2.8498	up	6.9032	2.78727	up	Y_RNA		ENSG00000223154	scRNA	RFAM:RF00019	chr16	66584360	66584470	+
chr17.trna5	0.0183844	0.0136682	2.81514	1.49321	up	-1.12352	-0.168022	down	trna5			tRNA		chr17	8029064	8029134	+
ENSG00000200320	0.0183844	0.0137047	6.42736	2.68423	up	2.37226	1.24626	up	SNORA63		ENSG00000200320	snoRNA	RFAM:RF00092	chr3	186505089	186505220	+
MI0017308	0.0183998	0.0138186	2.2749	1.1858	up	-1.71936	-0.781873	down	hsa-mir-4677	100616343		miRNA	miRBase:MI0017308	chr1	243509478	243509557	+
MI0000269	0.0183998	0.0138277	6.24028	2.64161	up	1.99826	0.998745	up	hsa-mir-181a-2	406954	ENSG00000207595	miRNA	miRBase:MI0000269|RFAM:RF00076	chr9	127454721	127454830	+
MI0003602	0.0184421	0.0139154	2.69619	1.43092	up	-1.69454	-0.760893	down	hsa-mir-590	693175	ENSG00000207741	miRNA	miRBase:MI0003602	chr7	73605528	73605624	+
MI0000446	0.0192607	0.0147082	2.22532	1.15401	up	-1.31742	-0.397713	down	hsa-mir-125b-1	406911	ENSG00000207971	miRNA	miRBase:MI0000446	chr11	121970465	121970552	-
MI0000289	0.0192607	0.0147055	6.08093	2.60429	up	1.95489	0.96709	up	hsa-mir-181a-1	406995	ENSG00000207759	miRNA	miRBase:MI0000289	chr1	198828173	198828282	-
MI0003782	0.0195929	0.0150212	4.40791	2.14009	up	1.86436	0.898679	up	hsa-mir-1468	100302115	ENSG00000222532	miRNA	miRBase:MI0003782	chrX	63005882	63005967	-
MI0000063	0.020031	0.0154178	6.02724	2.5915	up	3.67416	1.87741	up	hsa-let-7b	406884	ENSG00000207875	miRNA	miRBase:MI0000063|RFAM:RF00027	chr22	46509566	46509648	+
MI0006402	0.0250515	0.0196613	3.23749	1.69488	up	1.07967	0.11059	up	hsa-mir-548o	100302247	ENSG00000221510	miRNA	miRBase:MI0006402	chr7	102046189	102046302	-
MI0006354	0.0250515	0.0196616	3.23881	1.69546	up	1.01679	0.0240149	up	hsa-mir-548k	100302272	ENSG00000221333	miRNA	miRBase:MI0006354	chr11	70130061	70130176	+
MI0016746	0.0258533	0.0203693	3.14127	1.65135	up	1.0497	0.0699832	up	hsa-mir-548o-2	100616190		miRNA	miRBase:MI0016746	chr20	37145206	37145275	+
chr2.trna3	0.0287671	0.0227521	5.68321	2.50671	up	2.18568	1.12808	up	trna3			tRNA		chr2	27274082	27274154	+
MI0000108	0.0289134	0.0229554	3.1849	1.67125	up	-1.15506	-0.207968	down	hsa-mir-103a-2	406896	ENSG00000199024	miRNA	miRBase:MI0000108	chr20	3898141	3898218	+
MI0000109	0.0291957	0.0232681	3.14163	1.65152	up	-1.1736	-0.230942	down	hsa-mir-103a-1	406895	ENSG00000199035	miRNA	miRBase:MI0000109	chr5	167987901	167987978	-
chr8.trna6	0.0349789	0.0279831	6.13218	2.6164	up	3.5885	1.84338	up	trna6			tRNA		chr8	67026424	67026496	+
MI0000078	0.0350089	0.0281132	3.92156	1.97143	up	1.40047	0.485915	up	hsa-mir-22	407004	ENSG00000199060	miRNA	miRBase:MI0000078	chr17	1617197	1617281	-
MI0000745	0.035643	0.0287304	2.63545	1.39805	up	-1.6898	-0.756848	down	hsa-mir-301a	407027	ENSG00000207996	miRNA	miRBase:MI0000745	chr17	57228497	57228582	-
MI0015903	0.037725	0.0305572	2.93334	1.55254	up	1.2134	0.279055	up	hsa-mir-500b	100422911		miRNA	miRBase:MI0015903	chrX	49775280	49775358	+
MI0000093	0.037725	0.0306373	2.55479	1.3532	up	-1.01273	-0.0182508	down	hsa-mir-92a-1	407048	ENSG00000207968	miRNA	miRBase:MI0000093	chr13	92003568	92003645	+
MI0003839	0.0383413	0.0313701	3.87188	1.95303	up	2.59102	1.37352	up	hsa-mir-320b-2	100302180	ENSG00000221406	miRNA	miRBase:MI0003839	chr1	224444706	224444843	-
MI0000094	0.038618	0.0317135	2.43449	1.28362	up	-1.07569	-0.105263	down	hsa-mir-92a-2	407049	ENSG00000208034	miRNA	miRBase:MI0000094	chrX	133303568	133303642	-
ENSG00000200309	0.0464562	0.0382912	3.94519	1.98009	up	2.52806	1.33803	up	Y_RNA		ENSG00000200309	scRNA	RFAM:RF00019	chr12	49526636	49526730	-
